# Supplementary material
Source: Research Square preprint supplement (doi:10.21203/rs.3.rs-8962388/v1)
Supplement: Supplementary file 1 [file 0146d391da0f6fa10f7e92d7.xlsx]

## Sheet: Sheet1
antibio_name	antibio_variations	acorn_antibio_code	abx_grp_1	abx_grp_2	abx_grp_3	grp_by_who	grp_by_PGH	grp_by_aware	grp_by_aware_detail	WHOdrug	ast_code_acorn	ast_code_neo_gn	ast_code_neo_gp	ast_code_neo_other	Intrinsic resistances
Amoxicillin with clavulanic acid		antibiotic_j01cr02	Penicillins	Penicillins	Beta-lactams	undefined		Access	Access		AMC	gn_co_amoxy			Acinetobacter baumannii, Acinetobacter calcoaceticus complex, Burkholderia cepacia complex, Pseudomonas aeruginosa, Stenotrophomonas maltophilia, Citrobacter freundii, Enterobacter cloacae complex, Klebsiella aerogenes, Morganella morganii, Serratia spp., Acinetobacter baumannii, Acinetobacter calcoaceticus complex, Burkholderia cepacia complex, Pseudomonas aeruginosa, Stenotrophomonas maltophilia
Amoxicillin/Clavulanic acid	Amoxicillin-Clavulanate	antibiotic_j01cr02	Penicillins	Penicillins	Beta-lactams	undefined		Access	Access		AMC	gn_co_amoxy			Citrobacter freundii, Enterobacter cloacae complex, Klebsiella aerogenes, Morganella morganii, Serratia spp.
Amoxicillin-Clavulanate	Amoxicillin-Clavulanate, Amoxicillin/Clavulanic acid, Amoxicillin with clavulanic acid	antibiotic_j01cr02	Penicillins	Penicillins	Beta-lactams	undefined		Access	Access		AMC	gn_co_amoxy			Citrobacter freundii, Enterobacter cloacae complex, Klebsiella aerogenes, Morganella morganii, Serratia spp.
Amikacin		antibiotic_j01gb06	Aminoglycosides	Aminoglycosides	Aminoglycosides	undefined	firstline	Access	Access		AMK	gn_amik	gp_amik		Stenotrophomonas maltophilia, Enterococcus faecalis, Enterococcus faecium
Ampicillin		antibiotic_j01ca01	Penicillins	Penicillins	Beta-lactams	firstline	firstline	Access	Access		AMP				Citrobacter freundii, citrobacter koseri, Citrobacter amalonaticus group, Enterobacter cloacae complex, Escherichia hermannii, Kelbsiella aerogenes, Klebsiella penumoniae, Klebsiella oxytoca, Klebsiella variicola, Morganella morganii, Proteus penneri, Proteus vulgaris, Serratia spp.
Aztreonam			Monobactams	Monobactams	Monobactams			Reserve	Reserve		ATM				Acinetobacter baumannii, Acinetobacter calcoaceticus complex, Stenotrophomonas maltophilia
Azithromycin		antibiotic_j01fa10	Macrolides	Macrolides	Macrolides			Watch	Watch		AZM
Aggregate Carbapenems			Carbapenems	Carbapenems	Beta-lactams	thirdline		Not classified	High Watch		carbapenem
Ceftazidime		antibiotic_j01dd02	3rd generation cephalosporins	cephalosporins	Beta-lactams	secondline		Watch	Medium watch		CAZ	gn_ceftaz
Chloramphenicol			Phenicols	Phenicols	Phenicols			Access	Access		CHL				Acinetobacter baumannii, Acinetobacter calcoaceticus complex, Pseudomonas aeruginosa
Ciprofloxacin		antibiotic_j01ma02	Fluoroquinolones	Fluoroquinolones	Fluoroquinolones			Watch	Medium watch		CIP	gn_cipro	gp_cipro
Clindamycin		antibiotic_j01ff01	Macrolides	Macrolides	Macrolides			Access	Access		CLI		gp_clind
Colistin			Other	Other	Other			Reserve	Reserve		COL
Ceftriaxone		antibiotic_j01dd04	3rd generation cephalosporins	cephalosporins	Beta-lactams	secondline		Watch	Low watch		CRO				Pseudomonas aeruginosa, Stenotrophomonas maltophilia
Ceftriaxone - meningitis		antibiotic_j01dd04	3rd generation cephalosporins	cephalosporins	Beta-lactams	secondline		Watch	Low watch		CRO_MEN
Cefotaxime		antibiotic_j01dd01	3rd generation cephalosporins	cephalosporins	Beta-lactams	secondline		Watch	Low watch		CTX	gn_cefotax			Pseudomonas aeruginosa, Stenotrophomonas maltophilia
Cefortazime			3rd generation cephalosporins	cephalosporins	Beta-lactams	secondline		Watch	Low watch		CTX	gn_cefotax
Cefotaxime - meningitis		antibiotic_j01dd01	3rd generation cephalosporins	cephalosporins	Beta-lactams	secondline		Watch	Low watch		CTX_MEN
Doripenem		antibiotic_j01dh04	Carbapenems	Carbapenems	Beta-lactams	thirdline		Watch	High Watch		DOR
Erythromycin		antibiotic_j01fa01	Macrolides	Macrolides	Macrolides			Watch	Watch		ERY		gp_erythro
Ertapenem		antibiotic_j01dh03	Carbapenems	Carbapenems	Beta-lactams	thirdline		Watch	High Watch		ETP				Acinetobacter baumannii, Acinetobacter calcoaceticus complex, Burkholderia cepacia complex, Pseudomonas aeruginosa, Stenotrophomonas maltophilia
Cefepime		antibiotic_j01de01	4th generation cephalosporins	cephalosporins	Beta-lactams			Watch	Low watch		FEP
Cephepime			4th generation cephalosporins	cephalosporins	Beta-lactams			Watch	Low watch		FEP
Aggregate Fluoroquinolones			Fluoroquinolones	Fluoroquinolones	Fluoroquinolones			Not classified	Medium watch		fluoroquinolone
Gentamicin		antibiotic_j01gb03	Aminoglycosides	Aminoglycosides	Aminoglycosides	first line		Access	Access		GEN	gn_gent	gp_gent	gp_gent100	Stenotrophomonas maltophilia, Enterococcus faecalis, Enterococcus faecium
Imipenem		antibiotic_j01dh51	Carbapenems	Carbapenems	Beta-lactams	thirdline		Watch	High Watch		IPM	gn_imipen			Stenotrophomonas maltophilia
Levofloxacin		antibiotic_j01ma12	Fluoroquinolones	Fluoroquinolones	Fluoroquinolones			Watch	Medium watch		LVX
Meropenem		antibiotic_j01dh02	Carbapenems	Carbapenems	Beta-lactams	thirdline	secondline	Watch	High Watch		MEM	gn_meropen			Stenotrophomonas maltophilia
Moxifloxacin		antibiotic_j01ma14	Fluoroquinolones	Fluoroquinolones	Fluoroquinolones			Watch	Medium watch		MFX
Norfloxacin		antibiotic_j01ma06	Other	Other	Fluoroquinolones			Access	Access		NIT
Ofloxacin		antibiotic_j01ma01	Fluoroquinolones	Fluoroquinolones	Fluoroquinolones			Watch	Medium watch		OFX
Oxacillin			Penicillins	Penicillins	Beta-lactams			Access	Access		OXA		gp_oxacill
Perfloxacin			Fluoroquinolones	Fluoroquinolones	Fluoroquinolones			Not classified	Not classified		PEF
Penicillin G			Penicillins	Penicillins	Beta-lactams			Not classified	Not classified		PEN		gp_penicillin
Penicillin G - meningitis			Penicillins	Penicillins	Beta-lactams			Not classified	Not classified		PEN_MEN
Ampicillin/Sulbactam		antibiotic_j01cr01	Penicillins	Penicillins	Beta-lactams	undefined		Access	Access		SAM
Spectinomycin			Other	Other	Other			Access	Access		SPT
Trimethoprim/Sulfamethoxazole			Folate antagonists	Folate antagonists	Folate antagonists			Access	Access		SXT	gn_trimetho	gp_trimetho		Pseudomonas aeruginosa
Tetracycline		antibiotic_j01aa07	Tetracyclines	Tetracyclines	Tetracyclines			Access	Access		TCY		gp_tetra		Pseudomonas aeruginosa
Aggregate 3rd gen. ceph.			3rd generation cephalosporins	cephalosporins	Beta-lactams	secondline		Not classified	Not classified		thirdgenceph
Piperacillin-tazobactam		antibiotic_j01cr05	Penicillins	Penicillins	Beta-lactams	undefined		Watch	Medium watch		TZP	gn_pipertaz			Stenotrophomonas maltophilia
Piperacillin/Tazobactam		antibiotic_j01cr05	Penicillins	Penicillins	Beta-lactams	undefined		Watch	Medium watch		TZP	gn_pipertaz			Stenotrophomonas maltophilia
Vancomycin		antibiotic_j01xa01	Glycopeptides	Glycopeptides	Glycopeptides			Watch	Watch		VAN		gp_vanc
Neomycin			Macrolides	Macrolides	Aminoglycosides			Watch	Watch			gn_neomycin	gp_neomyc
Tobramycin			Macrolides	Macrolides	Aminoglycosides	undefined		Watch	Watch			gn_tobramic	gp_tobra
Ethambutol			Other	Other	Anti-mycobacterials	undefined		Not classified	Not classified
Isoniazid			Other	Other	Anti-mycobacterials	undefined		Not classified	Not classified
Pyrazinamide			Other	Other	Anti-mycobacterials	undefined		Not classified	Not classified
Amoxicillin		antibiotic_j01ca04	Penicillins	Penicillins	Beta-lactams	undefined		Access	Access			gn_amoxy	gp_amoxy
Benzylpenicillin		antibiotic_j01ce01	Penicillins	Penicillins	Beta-lactams	firstline		Access	Access
Cloxacillin		antibiotic_j01cf02	Penicillins	Penicillins	Beta-lactams	undefined		Access	Access
Ampicillin-sulbactam		antibiotic_j01cr01	Penicillins	Penicillins	Beta-lactams	undefined		Access	Access						Acinetobacter baumannii, Acinetobacter calcoaceticus complex, Burkholderia cepacia complex, Pseudomonas aeruginosa, Stenotrophomonas maltophilia, Serratia spp. Citrobacter freundii, Enterobacter cloacae complex, Hafnia alvei, Klebsiella aerogenes
Cephalexin		antibiotic_j01db01	1st generation cephalosporin	cephalosporins	Beta-lactams	undefined		Access	Access
Cefixime		antibiotic_j01dd08	3rd generation cephalosporins	cephalosporins	Beta-lactams	secondline		Watch	Low watch
Cefalexin			1st generation cephalosporin	cephalosporins	Beta-lactams			Access	Access
Cefazolin			1st generation cephalosporin	cephalosporins	Beta-lactams			Access	Access
Cephazolin			1st generation cephalosporin	cephalosporins	Beta-lactams			Access	Access						Citrobacter freundii, Enterobacter cloacae complex,hafnia alvei, Klebsiella aerogenes, Morganella morganii, Proteus penneri, Proteus vulgaris, providencia rettgeri, Providncia stuartii, Serratia marcescens
Cefuroxime			2nd generation cephalosporin	cephalosporins	Beta-lactams			Watch	Low watch			gn_cefur			Citrobacter freundii, Morganella morganii, Proteus penneri, Proteus vulgaris, Serratia marcescens
Ceftaroline			5th generation cephalosporins	cephalosporins	Beta-lactams			Reserve	Reserve
Faropenem			Carbapenems	Carbapenems	Beta-lactams			Reserve	Reserve
Imipenem and cilastatin			Carbapenems	Carbapenems	Beta-lactams	thirdline		Watch	High Watch
Benzathine benzylpenicillin			Penicillins	Penicillins	Beta-lactams			Access	Access
Flucloxacillin			Penicillins	Penicillins	Beta-lactams			Access	Access				gp_fluclox
Methicillin			Penicillins	Penicillins	Beta-lactams			Not classified	Not classified				gp_methic
Phenoxymethylpenicillin			Penicillins	Penicillins	Beta-lactams			Access	Access
Procaine benzylpenicillin			Penicillins	Penicillins	Beta-lactams			Access	Access
Aqueous penicillin G					Beta-lactams
Fusidic acid			Fusidane	Fusidane	Fusidane			Watch	Watch				gp_fusid		Staphylococcus saprophyticus
Teicoplanin		antibiotic_j01xa02	Teicoplanin	Teicoplanin	Glycopeptide			Watch	Watch				gp_teico
Amphotericin B			Antifungals	Antifungals	I can look at classifying these if we plan to report on anti-fungal resistance?			Not classified	Not classified
Daptomycin		antibiotic_j01xx09	Other	Other	lipopeptide			Reserve	Reserve
Clarithromycin		antibiotic_j01fa09	Macrolides	Macrolides	Macrolides			Watch	Watch
Nitrofurantoin			Nitrofuran	Nitrofuran	Nitrofuran			Access	Access
Metronidazole		antibiotic_j01xd01	Nitroimidazoles	Nitroimidazoles	Nitroimidazoles			Access	Access
Linezolid		antibiotic_j01xx08	Other	Other	oxazolidinones			Reserve	Reserve				gp_linezolid
Fosfomycin			Phosphonic	Phosphonic	Phosphonic			Watch	Watch						Acinetobacter baumannii, Acinetobacter calcoaceticus complex, Burkholderia cepacia complex, Stenotrophomonas maltophilia, Staphylococcus saprophyticus, Staphylococcus capitis
Polymixin B			Polymixin	Polymixin	Polymixin			Reserve	Reserve						Morganella morganii, Proteus mirabilis, Serratia marcescens, Burkholderia cepacia complex
Polymixyn			Polymixin	Polymixin	Polymixin			Reserve	Reserve						Morganella morganii, Proteus mirabilis, Serratia marcescens, Burkholderia cepacia complex
Polymycin			Polymixin	Polymixin	Polymixin			Reserve	Reserve						Morganella morganii, Proteus mirabilis, Serratia marcescens, Burkholderia cepacia complex
Polymycin B			Polymixin	Polymixin	Polymixin			Reserve	Reserve						Morganella morganii, Proteus mirabilis, Serratia marcescens, Burkholderia cepacia complex
Polymyxin B			Polymixin	Polymixin	Polymixin			Reserve	Reserve						Morganella morganii, Proteus mirabilis, Serratia marcescens, Burkholderia cepacia complex
Rifampicin			Macrocyclic	Macrocyclic	RIfamycin			Watch	Watch				gp_rifamp
Doxycycline		antibiotic_j01aa02	Tetracyclines	Tetracyclines	Tetracyclines			Access	Access						Proteus mirabilis, Proteus penneri, Proteus vulgaris, providencia rettgeri, Providencia stuartii
Tigecycline		antibiotic_j01aa12	Tetracyclines	Tetracyclines	Tetracyclines			Reserve	Reserve						Proteus mirabilis, Proteus penneri, Proteus vulgaris, providencia rettgeri, Providencia stuartii
Ceftazidime-Avibactam			Combined 3GC and beta-lactamase inhibitor					Reserve	Reserve
Synercid								Not classified	Not classified				gp_syner
Anidulafungin			Antifungals	Antifungals				Not classified	Not classified
Caspofungin			Antifungals	Antifungals				Not classified	Not classified
Fluconazole			Antifungals	Antifungals				Not classified	Not classified
Flucytosine			Antifungals	Antifungals				Not classified	Not classified
Itraconazole			Antifungals	Antifungals				Not classified	Not classified
Micafungin			Antifungals	Antifungals				Not classified	Not classified
Posaconazole			Antifungals	Antifungals				Not classified	Not classified
Voriconazole			Antifungals	Antifungals				Not classified	Not classified

## Sheet: df_structure
Episode table
episode_id	abx_grp_1_all	abx_grp_2_all	D-J	any_ecoli_e	any_knp_e	xx	xx	ecoli_resis_abx3	ecoli_resis_abx_e	kpn_resis_abx3	xxx_resis_abx3	xxx_resis_abx3	Amikacin	AMK	Amoxicillin	Amoxicillin-Clavulanate	Ampicillin	Ampicillin-Sulbactam	Azithromycin	Benzylpenicillin
1	Aminoglycosides; Penicillins			yes				Aminoglycosides, xxx	GEN, AMK, AMP etc				Amikacin			Amoxicillin-Clavulanate
2				no				not relevant	not relevant
3				NA				NA	NA										Azithromycin
4																	Ampicillin
5
6
7
8
									GO to odat3
									loop by episode id
										loop the organism rows
											if ecoli	loop three letter AST columns
												if GEN = resistant, add/append GEN in ecoli_R_abx_e
												if AMK = xx
											if knp
