# Supplementary material
Source: Research Square preprint supplement (doi:10.21203/rs.3.rs-8962388/v1)
Supplement: Supplementary file 2 [file 0dc00d8df117724c99a00089.docx]

Supplementary File S2 — NeoSEAP ETL Workflow: Transform Module

# Overview

This supplementary file contains the fully annotated Transform module used in NeoSEAP data cleaning. The Transform module standardises dates, harmonises organism names, integrates free-text organism entries, assigns pathogenicity classifications, derives episode-level and specimen-level variables, and creates grouped antibiotic classifications according to AWaRe and drug class definitions.

Outputs include:

- cleaned persons
- cleaned episodes
- cleaned specimens
- cleaned organisms
- organisms_with_pathogenicity
- antibiotics

# Annotated Transform Script

suppressPackageStartupMessages({
 library(dplyr)
 library(stringr)
 library(tidyr)
 library(readxl)
 library(readr)
})

# ---------------------------------------------------------------------------
# Helper functions
# ---------------------------------------------------------------------------

to_na_empty <- function(x) {
 if (is.null(x)) return(x)
 if (is.character(x)) x <- trimws(x)
 dplyr::na_if(x, "")
}

canon_name <- function(x) {
 x %>%
 str_trim() %>%
 str_squish() %>%
 str_to_lower()
}

# ---------------------------------------------------------------------------
# 1. Persons
# ---------------------------------------------------------------------------

stopifnot(exists("pdat0_raw"))

persons <- pdat0_raw %>%
 rename_with(~ str_replace_all(., "\\s+", "_"))
# add any person-level cleaning here

message("Transform[persons]: done (n = ", nrow(persons), ")")

# ---------------------------------------------------------------------------
# 2. Episodes (robust; keep row if any signal column non-empty)
# ---------------------------------------------------------------------------

stopifnot(exists("edat0_wide_raw"))

episode_base_all <- c(
 "age_inf_ep","inf_ep_date","clin_sepsis_inf_ep","dx_meningitis_inf_ep",
 "csf_meningitis_inf_ep","clin_infection_inf_ep","clin_infection_other",
 "symptoms_inf_ep","central_line_inf_ep","line_type_inf_ep","iv_lines_inf_ep",
 "other_lines_inf_ep","long_lines_other","cai_hai_inf_ep",
 "culture_date_inf_ep","additional_organism","second_culture_date",
 "third_organism_inf_ep","abx_number"
)

signal_candidates <- c(
 "inf_ep_date",
 "culture_date_inf_ep",
 "clin_infection_inf_ep",
 "organism_inf_ep","second_organism_inf_ep","third_organism_inf_ep","fourth_organism_inf_ep",
 "additional_organism",
 "abx_number"
)

collect_episode_block <- function(df, suffix, ep_num) {
 # Select and normalize column names for one episode block
 blk <- if (suffix == "") {
 df %>%
 select(
 record_id, participant_id, gest_age, enrol_date,
 any_of(episode_base_all),
 any_of(c(
 "organism_inf_ep","second_organism_inf_ep",
 "third_organism_inf_ep","fourth_organism_inf_ep"
 ))
 )
 } else {
 df %>%
 select(
 record_id, participant_id, gest_age, enrol_date,
 ends_with(suffix)
 ) %>%
 rename_with(~ str_remove(., fixed(suffix)), ends_with(suffix)) %>%
 select(
 record_id, participant_id, gest_age, enrol_date,
 any_of(episode_base_all),
 any_of(c(
 "organism_inf_ep","second_organism_inf_ep",
 "third_organism_inf_ep","fourth_organism_inf_ep"
 ))
 )
 }

 # Clean episode fields
 to_clean <- intersect(unique(c(episode_base_all, signal_candidates)), names(blk))
 blk <- blk %>%
 mutate(across(all_of(to_clean), to_na_empty))

 # Episode signal flag (any non-missing signal field)
 sig_present <- intersect(signal_candidates, names(blk))
 has_signal <- if (length(sig_present)) {
 mat <- as.data.frame(blk[, sig_present, drop = FALSE])
 rowSums(sapply(mat, function(v) !is.na(v) & v != "")) > 0
 } else {
 rep(FALSE, nrow(blk))
 }

 blk %>%
 mutate(
 age_inf_ep_num = suppressWarnings(as.numeric(.data[["age_inf_ep"]])),
 gest_age_num = suppressWarnings(as.numeric(.data[["gest_age"]])) + 22,
 EOS_LOS = if_else(age_inf_ep_num < 3, "EOS", "LOS", missing = NA_character_),
 corrected_age_inf_ep = age_inf_ep_num - ((40 - gest_age_num) * 7),
 neonate_corrected_age = case_when(
 !is.na(corrected_age_inf_ep) & corrected_age_inf_ep <= 28 ~ "neonate",
 !is.na(corrected_age_inf_ep) & corrected_age_inf_ep > 28 ~ "infant",
 TRUE ~ NA_character_
 ),
 episode_count = ep_num,
 inf_ep_date_dt = suppressWarnings(as.Date(.data[["inf_ep_date"]])),
 culture_date_inf_ep_dt = suppressWarnings(as.Date(.data[["culture_date_inf_ep"]])),
 enrol_date_dt = suppressWarnings(as.Date(.data[["enrol_date"]])),
 has_episode_signal = has_signal
 ) %>%
 select(-age_inf_ep_num, -gest_age_num)
}

ep1 <- collect_episode_block(edat0_wide_raw, "", 1)
ep2 <- collect_episode_block(edat0_wide_raw, "_v2", 2)
ep3 <- collect_episode_block(edat0_wide_raw, "_v3", 3)

episodes <- bind_rows(ep1, ep2, ep3) %>%
 filter(has_episode_signal) %>%
 mutate(
 episode_id = paste(record_id, episode_count, sep = "-")
 ) %>%
 arrange(
 participant_id, episode_count,
 coalesce(inf_ep_date_dt, culture_date_inf_ep_dt)
 ) %>%
 select(
 record_id, episode_id, participant_id, enrol_date, episode_count,
 any_of(episode_base_all),
 EOS_LOS, corrected_age_inf_ep, neonate_corrected_age
 )

message("Transform[episodes]: done (n = ", nrow(episodes), ")")

# ---------------------------------------------------------------------------
# 3. Antibiotics / AST (Rebuilt v2.0)
# ---------------------------------------------------------------------------

message("\n--- Starting Rebuilt Antibiotics Transformation ---")

# 3.1 Load antibiotic dictionary
dict_path <- "/Users/wan/Desktop/Sydney/NeoSEAP PS_ Rscripts and Data dictionary/acorn/data/reference/antibiotic_grouping_v0.1_20250909.xlsx"

if (!file.exists(dict_path)) {
 stop("CRITICAL ERROR: Antibiotic dictionary not found at: ", dict_path)
}

abx_grouping_raw <- read_excel(dict_path, sheet = 1, .name_repair = "universal")

# Normalize column names
names(abx_grouping_raw) <- tolower(names(abx_grouping_raw))

name_col_idx <- grep("antibio.*name", names(abx_grouping_raw))[1]
if (is.na(name_col_idx)) name_col_idx <- 1
names(abx_grouping_raw)[name_col_idx] <- "antibio_name"

code_col_idx <- grep("acorn.*code", names(abx_grouping_raw))[1]
if (!is.na(code_col_idx)) {
 names(abx_grouping_raw)[code_col_idx] <- "acorn_antibio_code"
}

message("Dictionary loaded. Name column identified as: ", names(abx_grouping_raw)[name_col_idx])

# Build lookup table for AST codes
abx_lookup <- abx_grouping_raw %>%
 select(
 antibio_name,
 any_of("acorn_antibio_code"),
 starts_with("abx_grp_"),
 starts_with("grp_by_"),
 starts_with("ast_code_neo_")
 ) %>%
 mutate(across(starts_with("ast_code_neo_"), as.character)) %>%
 pivot_longer(
 cols = starts_with("ast_code_neo_"),
 names_to = "source_type",
 values_to = "lookup_key"
 ) %>%
 filter(!is.na(lookup_key), lookup_key != "", lookup_key != "NA") %>%
 mutate(lookup_key = str_trim(tolower(lookup_key))) %>%
 distinct(lookup_key, .keep_all = TRUE)

message("Lookup table built with ", nrow(abx_lookup), " unique antibiotic codes.")

# 3.2 Process raw AST data
stopifnot(exists("adat0_wide_raw"))
stopifnot(exists("episodes"))

all_ast_cols <- names(adat0_wide_raw)[grepl("^(gp_|gn_)", names(adat0_wide_raw))]
mic_cols <- all_ast_cols[grepl("_mic", all_ast_cols)]
sir_cols <- setdiff(all_ast_cols, mic_cols)

# SIR data (categorical)
sir_long <- adat0_wide_raw %>%
 select(record_id, participant_id, all_of(sir_cols)) %>%
 mutate(across(all_of(sir_cols), to_na_empty)) %>%
 pivot_longer(
 cols = all_of(sir_cols),
 names_to = "raw_col_name",
 values_to = "sir_raw"
 ) %>%
 filter(!is.na(sir_raw))

# MIC data (numeric / text)
mic_long <- adat0_wide_raw %>%
 select(record_id, participant_id, all_of(mic_cols)) %>%
 mutate(across(all_of(mic_cols), to_na_empty)) %>%
 pivot_longer(
 cols = all_of(mic_cols),
 names_to = "raw_col_name_mic",
 values_to = "mic_raw"
 ) %>%
 filter(!is.na(mic_raw)) %>%
 mutate(
 link_col_name = str_remove(raw_col_name_mic, "_mic")
 )

# 3.3 Parse column metadata and build base key
sir_parsed <- sir_long %>%
 mutate(
 episode_count = case_when(
 str_detect(raw_col_name, "_ep2") ~ 2L,
 str_detect(raw_col_name, "_ep3") ~ 3L,
 TRUE ~ 1L
 ),
 panel = if_else(str_detect(raw_col_name, "_2($|_)"), 2L, 1L),
 base_key = raw_col_name,
 base_key = str_remove(base_key, "_ep[23]"),
 base_key = str_remove(base_key, "_2$"),
 base_key = str_trim(tolower(base_key))
 )

# 3.4 Merge MIC into SIR table
antibiotics_combined <- sir_parsed %>%
 left_join(
 mic_long %>% select(record_id, link_col_name, mic_raw),
 by = c("record_id", "raw_col_name" = "link_col_name")
 )

# 3.5 Join dictionary and episodes, standardize result
antibiotics <- antibiotics_combined %>%
 left_join(abx_lookup, by = c("base_key" = "lookup_key")) %>%
 left_join(
 episodes %>% select(record_id, episode_count, episode_id),
 by = c("record_id", "episode_count")
 ) %>%
 mutate(
 ast_result = toupper(trimws(sir_raw)),
 ast_result = case_when(
 ast_result %in% c("S", "I", "R") ~ ast_result,
 TRUE ~ ast_result
 )
 ) %>%
 select(
 record_id,
 participant_id,
 episode_count,
 episode_id,
 antibiotic_name = antibio_name,
 antibiotic_code = any_of("acorn_antibio_code"),
 raw_ast_column = raw_col_name,
 ast_result,
 mic_result = mic_raw,
 starts_with("abx_grp_"),
 starts_with("grp_by_")
 ) %>%
 filter(!is.na(antibiotic_name)) %>%
 arrange(record_id, episode_count, antibiotic_name)

message("Transform[antibiotics]: Done.")
message(" - Final Rows: ", nrow(antibiotics))
message(" - Columns: ", paste(names(antibiotics), collapse = ", "))

# ---------------------------------------------------------------------------
# 4. Specimens
# ---------------------------------------------------------------------------

stopifnot(exists("sdat0_wide_raw"))

specimen_block <- function(df, suffix, ep_num) {
 # Select specimen fields for one episode block
 if (suffix == "") {
 d <- df %>%
 select(
 record_id, participant_id,
 culture_date_inf_ep, organism_inf_ep,
 second_culture_date, second_organism_inf_ep,
 third_culture_date, third_organism_inf_ep,
 fourth_culture_date, fourth_organism_inf_ep
 )
 } else {
 d <- df %>%
 select(
 record_id, participant_id,
 paste0("culture_date_inf_ep", suffix), paste0("organism_inf_ep", suffix),
 paste0("second_culture_date", suffix), paste0("second_organism_inf_ep", suffix),
 paste0("third_culture_date", suffix), paste0("third_organism_inf_ep", suffix),
 paste0("fourth_culture_date", suffix), paste0("fourth_organism_inf_ep", suffix)
 ) %>%
 rename_with(~ str_remove(., fixed(suffix)), ends_with(suffix))
 }

 d %>%
 rename(
 culture_date_1 = culture_date_inf_ep,
 organism_name_1 = organism_inf_ep,
 culture_date_2 = second_culture_date,
 organism_name_2 = second_organism_inf_ep,
 culture_date_3 = third_culture_date,
 organism_name_3 = third_organism_inf_ep,
 culture_date_4 = fourth_culture_date,
 organism_name_4 = fourth_organism_inf_ep
 ) %>%
 mutate(across(starts_with("culture_date_"), to_na_empty)) %>%
 pivot_longer(
 cols = starts_with("culture_date_") | starts_with("organism_name_"),
 names_to = c(".value", "culture_count"),
 names_pattern = "(.*)_(\\d+)",
 values_drop_na = FALSE
 ) %>%
 filter(!is.na(culture_date), culture_date != "") %>%
 mutate(
 culture_count = as.integer(culture_count),
 episode_count = ep_num,
 culture_date_dt = suppressWarnings(as.Date(culture_date))
 )
}

sp1 <- specimen_block(sdat0_wide_raw, "", 1)
sp2 <- specimen_block(sdat0_wide_raw, "_v2", 2)
sp3 <- specimen_block(sdat0_wide_raw, "_v3", 3)

specimens <- bind_rows(sp1, sp2, sp3) %>%
 mutate(
 episode_id = paste(record_id, episode_count, sep = "-"),
 culture_id = paste(episode_id, culture_count, sep = "-")
 ) %>%
 select(
 record_id, participant_id, episode_count, episode_id,
 culture_date, culture_count, culture_id, organism_name
 ) %>%
 arrange(record_id, episode_count, culture_count)

message("Transform[specimens]: done (n = ", nrow(specimens), ")")

# ---------------------------------------------------------------------------
# 5. Organisms
# ---------------------------------------------------------------------------

stopifnot(exists("odat0_wide_raw"))

org_lookup <- tibble::tibble(
 organism_code = c(
 1, 2, 3, 4, 5, 6, 7, 8, 9, 10,
 11, 12, 13, 14, 15, 16, 17, 18, 19, 20,
 21, 22, 23, 24, 25, 26, 27, 28, 29, 30,
 31, 32, 33, 34, 35, 36, 37, 38, 39, 40,
 41, 42, 43, 44, 45, 98
 ),
 organism_label = c(
 "GRAM-NEGATIVE",
 "Acinetobacter baumannii",
 "Acinetobacter lwoffii",
 "Burkholderia cepacia",
 "Burkholderia mallei",
 "Burkholderia pseudomallei",
 "Campylobacter jejuni",
 "Campylobacter coli",
 "Citrobacter freundii",
 "Citrobacter koseri",
 "Enterobacter cloacae",
 "Enterobacter aerogenes",
 "Escherichia coli",
 "Haemophilus influenzae type b",
 "Haemophilus influenzae non-typeable strains",
 "Klebsiella oxytoca",
 "Klebsiella pneumoniae",
 "Proteus mirabilis",
 "Proteus vulgaris",
 "Pseudomonas aeruginosa",
 "Salmonella enterica var typhi",
 "Salmonella enterica var paratyphi",
 "Salmonella (non-typhoidal)",
 "Shigella dysenteriae",
 "Shigella flexneri",
 "Shigella sonnei",
 "Serratia marcescens",
 "GRAM-POSITIVE",
 "Coagulase Negative Staphylococcus Spp. (CoNS)",
 "Enterococcus faecalis",
 "Enterococcus faecium",
 "Listeria monocytogenes",
 "Streptococcus pyogenes (Group A Streptococcus, GAS)",
 "Streptococcus agalactiae (Group B Streptococcus, GBS)",
 "Streptococcus pneumoniae",
 "Staphylococcus aureus",
 "Staphylococcus saprophyticus",
 "FUNGAL",
 "Candida albicans",
 "Candida krusei",
 "Candida glabrata",
 "Candida guilliermondii",
 "Candida lusitaniae",
 "Candida parapsilosis",
 "Candida tropicalis",
 "Other - please specify"
 )
)

extract_episode_org <- function(df, suffix, ep_num) {
 # Extract organisms for one episode block
 if (suffix == "") {
 d <- df %>%
 select(
 record_id, participant_id,
 culture_date_inf_ep, organism_inf_ep, organism_other,
 second_culture_date, second_organism_inf_ep, second_organism_other,
 third_culture_date, third_organism_inf_ep, third_organism_other,
 fourth_culture_date, fourth_organism_inf_ep, fourth_organism_other
 )
 } else {
 d <- df %>%
 select(
 record_id, participant_id,
 paste0("culture_date_inf_ep", suffix), paste0("organism_inf_ep", suffix), paste0("organism_other", suffix),
 paste0("second_culture_date", suffix), paste0("second_organism_inf_ep", suffix), paste0("second_organism_other", suffix),
 paste0("third_culture_date", suffix), paste0("third_organism_inf_ep", suffix), paste0("third_organism_other", suffix),
 paste0("fourth_culture_date", suffix), paste0("fourth_organism_inf_ep", suffix), paste0("fourth_organism_other", suffix)
 ) %>%
 rename_with(~ str_remove(., fixed(suffix)), ends_with(suffix))
 }

 d %>%
 rename(
 culture_date_1 = culture_date_inf_ep,
 org_a_1 = organism_inf_ep, org_b_1 = organism_other,
 culture_date_2 = second_culture_date,
 org_a_2 = second_organism_inf_ep, org_b_2 = second_organism_other,
 culture_date_3 = third_culture_date,
 org_a_3 = third_organism_inf_ep, org_b_3 = third_organism_other,
 culture_date_4 = fourth_culture_date,
 org_a_4 = fourth_organism_inf_ep, org_b_4 = fourth_organism_other
 ) %>%
 pivot_longer(
 cols = starts_with("culture_date_") | starts_with("org_"),
 names_to = c(".value", "culture_count"),
 names_pattern = "(.*)_(\\d+)"
 ) %>%
 filter(!is.na(culture_date), culture_date != "") %>%
 pivot_longer(
 cols = c(org_a, org_b),
 names_to = "source",
 values_to = "organism_raw"
 ) %>%
 filter(!is.na(organism_raw), organism_raw != "") %>%
 mutate(episode_count = ep_num)
}

og1 <- extract_episode_org(odat0_wide_raw, "", 1)
og2 <- extract_episode_org(odat0_wide_raw, "_v2", 2)
og3 <- extract_episode_org(odat0_wide_raw, "_v3", 3)

organisms <- bind_rows(og1, og2, og3) %>%
 mutate(
 organism_code = suppressWarnings(as.integer(organism_raw))
 ) %>%
 left_join(org_lookup, by = "organism_code") %>%
 mutate(
 organism_name_clean = ifelse(!is.na(organism_label), organism_label, organism_raw),
 episode_id = paste(record_id, episode_count, sep = "-"),
 culture_id = paste(episode_id, culture_count, sep = "-"),
 organism_id = paste(culture_id, source, sep = "-")
 ) %>%
 select(
 record_id, participant_id, episode_count, episode_id,
 culture_date, culture_count, culture_id,
 organism_id, organism_name_clean
 ) %>%
 arrange(record_id, episode_count, culture_count, organism_id)

message("Transform[organisms]: done (n = ", nrow(organisms), ")")
# --- Drop "Other - please specify" when a specific organism exists ---------

organisms <- organisms %>%
 group_by(culture_id) %>%
 mutate(
 has_specific_org = any(
 !is.na(organism_name_clean) &
 organism_name_clean != "" &
 organism_name_clean != "Other - please specify"
 )
 ) %>%
 ungroup() %>%
 filter(!(has_specific_org & organism_name_clean == "Other - please specify")) %>%
 select(-has_specific_org)


# ---------------------------------------------------------------------------
# 6. Add pathogenicity lookup (NeoSEAP → ACORN)
# ---------------------------------------------------------------------------

lookup_path <- "/Users/wan/Desktop/Sydney/NeoSEAP PS_ Rscripts and Data dictionary/acorn/data/reference/neoseap_pathogenicity_lookup_v1.csv"

lookup <- read_csv(lookup_path, show_col_types = FALSE) %>%
 mutate(
 neoseap_clean = canon_name(neoseap_name),
 acorn_clean = canon_name(acorn_name)
 )

organisms_clean <- organisms %>%
 mutate(organism_clean = canon_name(organism_name_clean))

organisms_with_pathogenicity <- organisms_clean %>%
 left_join(
 lookup %>%
 select(neoseap_clean, acorn_clean, acorn_pathogen, pathogen_grp, everything()),
 by = c("organism_clean" = "neoseap_clean")
 )

out_file <- "/Users/wan/Desktop/Sydney/NeoSEAP PS_ Rscripts and Data dictionary/acorn/data/output/organisms_with_pathogenicity.csv"
write_csv(organisms_with_pathogenicity, out_file)

message("Generated organisms_with_pathogenicity: ", nrow(organisms_with_pathogenicity), " rows")
message("Saved to: ", out_file)

# ---------------------------------------------------------------------------
# 7. Episode-level summary (Sheet2-style)
# ---------------------------------------------------------------------------

if (!exists("organisms") || !exists("antibiotics")) {
 stop("Both 'organisms' and 'antibiotics' must exist.")
}

# Base episode list (union of antibiotics and organisms)
all_episodes <- unique(c(antibiotics$episode_id, organisms$episode_id))
episode_summary <- data.frame(episode_id = all_episodes)

# 7.1 Wide AST grid (one column per antibiotic)
ast_wide <- antibiotics %>%
 distinct(episode_id, antibiotic_name, .keep_all = TRUE) %>%
 select(episode_id, antibiotic_name, ast_result) %>%
 pivot_wider(
 names_from = antibiotic_name,
 values_from = ast_result,
 values_fill = ""
 )

# 7.2 Antibiotic group summaries
grp_summary <- antibiotics %>%
 group_by(episode_id) %>%
 summarise(
 abx_grp_1_all = paste(sort(unique(na.omit(abx_grp_1))), collapse = "; "),
 abx_grp_2_all = paste(sort(unique(na.omit(abx_grp_2))), collapse = "; "),
 .groups = "drop"
 )

# 7.3 Organism flags per episode
org_flags <- organisms %>%
 group_by(episode_id) %>%
 summarise(
 any_ecoli_e = if_else(
 any(str_detect(organism_name_clean, regex("Escherichia coli", ignore_case = TRUE))),
 "yes", "no"
 ),
 any_kpn_e = if_else(
 any(str_detect(organism_name_clean, regex("Klebsiella pneumoniae", ignore_case = TRUE))),
 "yes", "no"
 ),
 any_saureus_e = if_else(
 any(str_detect(organism_name_clean, regex("Staphylococcus aureus", ignore_case = TRUE))),
 "yes", "no"
 ),
 .groups = "drop"
 )

# 7.4 Resistance strings for E. coli and K. pneumoniae
ecoli_episodes <- org_flags %>%
 filter(any_ecoli_e == "yes") %>%
 pull(episode_id)

kpn_episodes <- org_flags %>%
 filter(any_kpn_e == "yes") %>%
 pull(episode_id)

resis_ecoli <- antibiotics %>%
 filter(episode_id %in% ecoli_episodes) %>%
 filter(ast_result == "R") %>%
 filter(!is.na(antibiotic_code)) %>%
 arrange(antibiotic_code) %>%
 group_by(episode_id) %>%
 summarise(
 ecoli_resis_abx3 = paste(unique(antibiotic_code), collapse = ", "),
 ecoli_resis_abx_e = paste(unique(antibiotic_name), collapse = ", "),
 .groups = "drop"
 )

resis_kpn <- antibiotics %>%
 filter(episode_id %in% kpn_episodes) %>%
 filter(ast_result == "R") %>%
 filter(!is.na(antibiotic_code)) %>%
 arrange(antibiotic_code) %>%
 group_by(episode_id) %>%
 summarise(
 kpn_resis_abx3 = paste(unique(antibiotic_code), collapse = ", "),
 .groups = "drop"
 )

# 7.5 Final join
final_sheet2 <- episode_summary %>%
 left_join(grp_summary, by = "episode_id") %>%
 left_join(org_flags, by = "episode_id") %>%
 left_join(resis_ecoli, by = "episode_id") %>%
 left_join(resis_kpn, by = "episode_id") %>%
 left_join(ast_wide, by = "episode_id") %>%
 mutate(across(everything(), ~ tidyr::replace_na(as.character(.), ""))) %>%
 mutate(`D-J` = "") %>%
 select(
 episode_id,
 abx_grp_1_all,
 abx_grp_2_all,
 `D-J`,
 any_ecoli_e,
 any_kpn_e,
 ecoli_resis_abx3,
 ecoli_resis_abx_e,
 kpn_resis_abx3,
 everything()
 )

message("Sheet2-style summary built. Rows: ", nrow(final_sheet2))

write_csv(
 final_sheet2,
 file.path(output_dir, "neoseapps_antibiotic_summary_sheet2.csv")
)

# ---------------------------------------------------------------------------
# Done
# ---------------------------------------------------------------------------

message("Transform complete: persons / episodes / specimens / organisms / antibiotics ready.")
