# Supplementary material
Source: Research Square preprint supplement (doi:10.21203/rs.3.rs-8962388/v1)
Supplement: Supplementary file 3 [file 0f7fe4e31da123452cb8c61f.docx]

Supplementary File S1 — NeoSEAP ETL Workflow: Extract Module

# Overview

This supplementary file documents the fully annotated Extract module used in the NeoSEAP data processing workflow. The Extract script imports raw NeoSEAP data files, reconstructs unique identifiers, reshapes wide laboratory data into long format, parses dates, and outputs the initial relational tables:

- persons
- episodes
- specimens
- organisms
- antibiotics_raw (if present)

All code is provided below with detailed commentary to ensure transparency and reproducibility across sites.

# Annotated Extract Script

suppressPackageStartupMessages({
 library(readr)
 library(dplyr)
 library(stringr)
 library(readxl)
 library(tools)
})

# 0) Load main raw data + data dictionary ------------------------------------

if (!exists("raw_data_file")) {
 stop("raw_data_file is not defined – please set it in the master run script.")
}
if (!exists("data_dictionary_file")) {
 stop("data_dictionary_file is not defined – please set it in the master run script.")
}

raw_data_main <- read_csv(raw_data_file, col_types = cols(.default = "c"))
raw_data_dict <- read_csv(data_dictionary_file)

message("Loaded raw_data_main: ", nrow(raw_data_main), " rows, ", ncol(raw_data_main), " columns.")
message("Loaded data dictionary: ", nrow(raw_data_dict), " rows.")

# ---------------------------------------------------------------------------
# 1) Persons table columns
# ---------------------------------------------------------------------------

persons_cols <- c(
 "record_id",
 "admiss_date","admiss_days",
 paste0("admiss_symptoms___", 1:28),
 "admit",
 paste0("admit_diagnosis___", 1:13),
 "admit_dx_other","bwt",
 paste0("conanom_type___", 1:12),
 "congen_anom","dc_destination","dc_status",
 "death_date","death_infection","death_other",
 "enrol_age","enrol_date","gest_age","hosp_since_birth",
 "infant_surgery","mode_delivery","mortality",
 "participant_id","primary_dc_death","prior_admiss_days",
 paste0("secondary_dc_death___", 1:6),
 "secondary_dc_death_other"
)

# ---------------------------------------------------------------------------
# 2) Episodes (wide; v1/v2/v3; select only existing cols)
# ---------------------------------------------------------------------------

episode_base_all <- c(
 "age_inf_ep","inf_ep_date","clin_sepsis_inf_ep","dx_meningitis_inf_ep",
 "csf_meningitis_inf_ep","clin_infection_inf_ep","clin_infection_other",
 "symptoms_inf_ep","central_line_inf_ep","line_type_inf_ep","iv_lines_inf_ep",
 "other_lines_inf_ep","long_lines_other","cai_hai_inf_ep",
 "culture_date_inf_ep","additional_organism","second_culture_date",
 "third_organism_inf_ep","abx_number"
)

base_present <- episode_base_all[episode_base_all %in% names(raw_data_main)]
v2_present <- paste0(episode_base_all, "_v2"); v2_present <- v2_present[v2_present %in% names(raw_data_main)]
v3_present <- paste0(episode_base_all, "_v3"); v3_present <- v3_present[v3_present %in% names(raw_data_main)]

episodes_cols <- unique(c(
 "record_id","participant_id","gest_age","enrol_date",
 base_present, v2_present, v3_present
))

# ---------------------------------------------------------------------------
# 3) Specimens (wide; one row per patient, multiple specimen columns)
# ---------------------------------------------------------------------------

specimen_base <- c(
 "culture_date_inf_ep", "organism_inf_ep",
 "second_culture_date", "second_organism_inf_ep",
 "third_culture_date", "third_organism_inf_ep",
 "fourth_culture_date", "fourth_organism_inf_ep"
)

specimens_cols <- c(
 "record_id","participant_id",
 specimen_base,
 paste0(specimen_base, "_v2"),
 paste0(specimen_base, "_v3")
)

# ---------------------------------------------------------------------------
# 4) Organisms (wide; per culture, multiple organisms)
# ---------------------------------------------------------------------------

organism_base <- c(
 "culture_date_inf_ep","organism_inf_ep","organism_other",
 "second_culture_date","second_organism_inf_ep","second_organism_other",
 "third_culture_date","third_organism_inf_ep","third_organism_other",
 "fourth_culture_date","fourth_organism_inf_ep","fourth_organism_other"
)

organisms_cols <- c(
 "record_id","participant_id",
 organism_base,
 paste0(organism_base, "_v2"),
 paste0(organism_base, "_v3")
)

# ---------------------------------------------------------------------------
# 5) AST / Antibiotic susceptibilities (wide; all episodes)
# ---------------------------------------------------------------------------

ast_abx_cols_all <- names(raw_data_main)[grepl("^(gp_|gn_)", names(raw_data_main))]

ast_abx_cols_ep1 <- sort(ast_abx_cols_all[!grepl("_ep[23]$", ast_abx_cols_all)])
ast_abx_cols_ep2 <- sort(ast_abx_cols_all[grepl("_ep2$", ast_abx_cols_all)])
ast_abx_cols_ep3 <- sort(ast_abx_cols_all[grepl("_ep3$", ast_abx_cols_all)])

message("AST vars ep1: ", length(ast_abx_cols_ep1),
 " | ep2: ", length(ast_abx_cols_ep2),
 " | ep3: ", length(ast_abx_cols_ep3))

ast_abx_cols <- c("record_id", "participant_id", sort(ast_abx_cols_all))

# ---------------------------------------------------------------------------
# 6) Organism codebook (hard-coded codes -> labels)
# ---------------------------------------------------------------------------

org_codebook <- tibble::tribble(
 ~organism_code, ~organism_label, ~is_header,
 1, "GRAM-NEGATIVE", TRUE,
 2, "Acinetobacter baumannii", FALSE,
 3, "Acinetobacter lwoffii", FALSE,
 4, "Burkholderia cepacia", FALSE,
 5, "Burkholderia mallei", FALSE,
 6, "Burkholderia pseudomallei", FALSE,
 7, "Campylobacter jejuni", FALSE,
 8, "Campylobacter coli", FALSE,
 9, "Citrobacter freundii", FALSE,
 10, "Citrobacter koseri", FALSE,
 11, "Enterobacter cloacae", FALSE,
 12, "Enterobacter aerogenes", FALSE,
 13, "Escherichia coli", FALSE,
 14, "Haemophilus influenzae type b", FALSE,
 15, "Haemophilus influenzae non-typeable strains", FALSE,
 16, "Klebsiella oxytoca", FALSE,
 17, "Klebsiella pneumoniae", FALSE,
 18, "Proteus mirabilis", FALSE,
 19, "Proteus vulgaris", FALSE,
 20, "Pseudomonas aeruginosa", FALSE,
 21, "Salmonella enterica var typhi", FALSE,
 22, "Salmonella enterica var paratyphi", FALSE,
 23, "Salmonella (non-typhoidal)", FALSE,
 24, "Shigella dysenteriae", FALSE,
 25, "Shigella flexneri", FALSE,
 26, "Shigella sonnei", FALSE,
 27, "Serratia marcescens", FALSE,
 28, "GRAM-POSITIVE", TRUE,
 29, "Coagulase Negative Staphylococcus Spp. (CoNS)", FALSE,
 30, "Enterococcus faecalis", FALSE,
 31, "Enterococcus faecium", FALSE,
 32, "Listeria monocytogenes", FALSE,
 33, "Streptococcus pyogenes (Group A Streptococcus, GAS)", FALSE,
 34, "Streptococcus agalactiae (Group B Streptococcus, GBS)", FALSE,
 35, "Streptococcus pneumoniae", FALSE,
 36, "Staphylococcus aureus", FALSE,
 37, "Staphylococcus saprophyticus", FALSE,
 38, "FUNGAL", TRUE,
 39, "Candida albicans", FALSE,
 40, "Candida krusei", FALSE,
 41, "Candida glabrata", FALSE,
 42, "Candida guilliermondii", FALSE,
 43, "Candida lusitaniae", FALSE,
 44, "Candida parapsilosis", FALSE,
 45, "Candida tropicalis", FALSE,
 98, "Other - please specify", FALSE
)

# ---------------------------------------------------------------------------
# 7) Try to load auxiliary reference tables (organism pathogenicity, abx grouping)
# ---------------------------------------------------------------------------

pick_first <- function(dir = "data", pattern = "") {
 f <- list.files(dir, pattern = pattern, full.names = TRUE, ignore.case = TRUE)
 if (length(f)) f[1] else NA_character_
}

organism_patho <- NULL
abx_grouping <- NULL

org_patho_path <- pick_first("data", "organism.*pathogen")
if (!is.na(org_patho_path)) {
 ext <- tolower(file_ext(org_patho_path))
 organism_patho <- if (ext %in% c("xlsx","xls")) {
 read_xlsx(org_patho_path)
 } else {
 read_csv(org_patho_path, show_col_types = FALSE)
 }
 message("Loaded organism_patho reference: ", org_patho_path,
 " (", nrow(organism_patho), " rows)")
}

abx_group_path <- pick_first("data", "antibiotic.*group")
if (!is.na(abx_group_path)) {
 ext <- tolower(file_ext(abx_group_path))
 abx_grouping <- if (ext %in% c("xlsx","xls")) {
 read_xlsx(abx_group_path)
 } else {
 read_csv(abx_group_path, show_col_types = FALSE)
 }
 message("Loaded abx_grouping reference: ", abx_group_path,
 " (", nrow(abx_grouping), " rows)")
}

# ---------------------------------------------------------------------------
# 8) Create raw subset datasets (wide)
# ---------------------------------------------------------------------------

message("Extract step: subsetting raw data into wide tables...")

pdat0_raw <- raw_data_main %>% select(any_of(persons_cols))
edat0_wide_raw <- raw_data_main %>% select(any_of(episodes_cols))
sdat0_wide_raw <- raw_data_main %>% select(any_of(specimens_cols))
odat0_wide_raw <- raw_data_main %>% select(any_of(organisms_cols))
adat0_wide_raw <- raw_data_main %>% select(any_of(ast_abx_cols))

# ---------------------------------------------------------------------------
# 9) Optional: warn if expected columns are missing in the raw export
# ---------------------------------------------------------------------------

warn_missing <- function(expected) {
 missing <- setdiff(expected, names(raw_data_main))
 if (length(missing)) warning("Missing columns: ", paste(missing, collapse = ", "))
}

warn_missing(persons_cols)
warn_missing(episodes_cols)
warn_missing(specimens_cols)
warn_missing(organisms_cols)
warn_missing(ast_abx_cols)

message("Extract complete: raw subsets ready for Transform step.")
message(" persons (pdat0_raw): ", ncol(pdat0_raw), " cols")
message(" episodes (edat0_wide_raw): ", ncol(edat0_wide_raw), " cols")
message(" specimens (sdat0_wide_raw): ", ncol(sdat0_wide_raw), " cols")
message(" organisms (odat0_wide_raw): ", ncol(odat0_wide_raw), " cols")
message(" AST/abx (adat0_wide_raw): ", ncol(adat0_wide_raw), " cols")
