# Supplementary material
Source: Research Square preprint supplement (doi:10.21203/rs.3.rs-8962388/v1)
Supplement: Supplementary file 4 [file 21ed1d23caf6b1551d612faa.xlsx]

## Sheet: in
Org_name	acorn_pathogen	pathogenicity	pathogen_grp	gram_grp	notes
Acinetobacter spp.	definite	high		gram neg	Sp is a broader concept. This is not a baumannii.
Acinetobacter baumannii	definite	high	baumannii	gram neg
Acinetobacter lwoffii	definite	high		gram neg
Acinetobacter sp	definite	high		gram neg	Sp is a broader concept. This is not a baumannii.
Aeromonas spp.	definite	high		gram neg
Arcanobacterium	contaminant	low		gram pos
Arthrobacter oxydans	contaminant	low		gram pos			.
Arthrobacter spp.	contaminant	low		gram pos
Bacillus cereus	possible	high		gram pos
Bacillus megaterium	contaminant	low		gram pos
Bacillus pumilus	contaminant	low		gram pos
Bacillus subtilis	contaminant	low		gram pos
Burkholderia cepacia	definite	high		gram neg
Burkholderia mallei	definite	high		gram neg
Burkholderia pseudomallei	definite	high		gram neg
Campylobacter jejuni	definite	high		gram neg
Campylobacer coli	definite	high		gram neg
Candida spp.	definite	high		fungal
Candida sp	definite	high		fungal
Candida albicans	definite	high		fungal
Candida glabrata	definite	high		fungal
Candida guilliermondii	definite	high		fungal
Candida lustianiae	definite	high		fungal
Candida paraspilosis	definite	high		fungal
Candida tropicalis	definite	high		fungal
Cellulomonas spp.	contaminant	low		gram pos
Cellulosimicrobium cellulans	contaminant	low		gram pos
Cellulosimicrobium spp.	contaminant	low		gram pos
Citrobacter spp.	definite	high		gram neg
Citrobacter sp	definite	high		gram neg
Citrobacter freuindii	definite	high		gram neg
Citrobacter koseri	definite	high		gram neg
Coagulase Negative Staphylococcus Spp. (CoNS)	contaminant	low		gram pos
CoNS	contaminant	low		gram pos
Corynebacterium amycolatum	contaminant	low		gram pos
Corynebacterium freneyi	contaminant	low		gram pos
Corynebacterium jeikeium	possible	high		gram pos
Cutibacterium spp.	contaminant	low		gram pos
Dermabacter spp.	contaminant	low		gram pos
Diptheroids Exiguobacterium spp.	contaminant	low		gram pos
Elizabethkingia meingosepticum	definite	high		gram neg
Enterobacter spp.	definite	high		gram neg
Enterobacter cloacae	definite	high		gram neg
Enterobacter aerogenes	definite	high		gram neg
Enterococcus spp.	definite	high		gram pos
Enterococcus faecium	definite	high		gram pos
Enterococcus faecalis	definite	high		gram pos
Escherichia coli	definite	high	coli	gram neg
Geobacillus spp.	contaminant	low		gram pos
Group A streptococcus	definite	high		gram pos
Group B streptococcus	definite	high		gram pos
Group D streptococcus	definite	high		gram pos
Haemophilis influenzae	definite	high		gram neg
Haemophilis influenzae type b	definite	high		gram neg
Haemophilis influenzae non-typeable strains	definite	high		gram neg
Helcobacillus spp.	contaminant	low		gram neg
Janibacter spp.	contaminant	low		gram pos
Klebsiella pneumoniae	definite	high	kpn	gram neg
Klebsiella oxytoca	definite	high		gram neg
Knoellia spp.	contaminant	low		gram pos
Kocuria marina	contaminant	low		gram pos
Kocuria palustris	contaminant	low		gram pos
Kluyvera sp	contaminant	low		gram neg
Leifsonia spp.	contaminant	low		gram pos
Leuconostoc spp.	possible	high		gram pos
Listeria monocytogenes	definite	high		gram pos
Lysinibacillus boronitolerans	contaminant	low		gram pos
Microbacterium arborescens	contaminant	low		gram pos
Microbacterium barkeri	contaminant	low		gram pos
Microbacterium paraoxydans	contaminant	low		gram pos
Microbacterium testaceum	contaminant	low		gram pos
Micrococcus luteus	contaminant	low		gram pos
Micrococcus sp.	contaminant	low		gram pos
Moraxella spp.	possible	high		gram neg
Morganella morganii	possible	high		gram pos
Neisseria meningitidis	definite	high		gram pos
Nesterenkonia spp.	contaminant	low		gram pos
Nocardia spp.	possible	high		gram pos
Paenibacillus amylolyticus	contaminant	low		gram pos
Paenibacillus spp.	contaminant	low		gram pos
Pantoea	contaminant	low		gram neg
Propionibacterium	contaminant	low		gram pos
Proteus mirabilis	definite	high		gram neg
Proteus vulgaris	definite	high		gram neg
Pseudoclavibacter	contaminant	low		gram pos
Pseudomonas aeruginosa	definite	high		gram neg
Salmonella spp.	definite	high		gram neg
Salmonella enterica var typhi	definite	high		gram neg
Salmonella enterica var typhi	definite	high		gram neg
Salmonella enterica var paratyphi	definite	high		gram neg
Salmonella (non-typhoidal)	definite	high		gram neg
Shigella dysenteriae	definite	high		gram neg
Shigella flexneri	definite	high		gram neg
Shigella sonnei	definite	high		gram neg
Serratia marcescens	definite	high	serratia	gram neg
Serratia sp	definite	high	serratia	gram neg
Shigella spp.	definite	high		gram neg
Staphylococcus arlettae	depends	low		gram pos
Staphylococcus aureus	definite	high		gram pos
Staphylococcus capitis	depends	low		gram pos
Staphylococcus caprae	depends	low		gram pos
Staphylococcus cohnii	depends	low		gram pos
Staphylococcus equorum	depends	low		gram pos
Staphylococcus gallinarum	depends	low		gram pos
Staphylococcus hominis	depends	low		gram pos
Staphylococcus saprophyticus	depends	low		gram pos
Staphylococcus succinus	depends	low		gram pos
Staphylococcus warneri	depends	low		gram pos
Staphylococcus xylosus	depends	low		gram pos
Staphylococcus sp	depends	low		gram pos
Streptococcus pneumoniae	definite	high		gram pos
Streptococccus pyogenes (Group A Streptococcus, GBS)	definite	high		gram pos
Streptococccus pyogenes	definite	high		gram pos
Streptococcus agalactiae (Group B Streptococcus, GBS)	definite	high		gram pos
Streptococcus agalactiae	definite	high		gram pos
Streptococcus viridians	possible	high		gram pos
Streptomyces violaceoruber	contaminant	low		gram pos
Streptomyces violaceoruber	contaminant	low		gram pos
Trueperella spp.	contaminant	low		gram pos
Virgibacillus spp.	contaminant	low		gram pos
