# Supplementary material
Source: Research Square preprint supplement (doi:10.21203/rs.3.rs-8962388/v1)
Supplement: Supplementary file 5 [file 7e5bac1e997de180c15c906c.docx]

Supplementary File S3 — NeoSEAP ETL Workflow: Load Module

# Overview

This supplementary file documents the Load module, which exports all cleaned NeoSEAP datasets as version-controlled outputs. Each execution produces:

- date-stamped CSV files:
  neoseapps_*_YYYY-MM-DD.csv
- “latest” versions for reporting:
  neoseapps_*_latest.csv

Optional outputs:

- organisms_with_pathogenicity
- antibiotic_summary_sheet2

This module ensures reproducibility, consistent naming conventions, and compatibility with downstream reports.

# Annotated Load Script

suppressPackageStartupMessages({
 library(readr)
 library(dplyr)
})

# 1) Sanity checks -----------------------------------------------------------
required_objects <- c("persons", "episodes", "specimens", "organisms", "antibiotics")
missing <- required_objects[!sapply(required_objects, exists)]
if (length(missing) > 0) {
 stop("Missing objects from Transform: ", paste(missing, collapse = ", "))
}

# 2) Resolve output dir & date ----------------------------------------------
if (!exists("output_dir")) {
 # fall back to ./data/output/ (aligns with your run script)
 output_dir <- file.path(getwd(), "data", "output")
}
if (!dir.exists(output_dir)) dir.create(output_dir, recursive = TRUE)

if (!exists("run_date")) run_date <- Sys.Date()
stamp <- format(run_date, "%Y-%m-%d") # keep the same style as your run script

# 3) Build file names (versioned + latest) ----------------------------------
f_ver <- function(stub) file.path(output_dir, paste0("neoseapps_", stub, "_", stamp, ".csv"))
f_cur <- function(stub) file.path(output_dir, paste0("neoseapps_", stub, "_latest.csv"))

# 4) Save core CSVs (persons / episodes / specimens / organisms) ------------
write_csv(persons, f_ver("persons"))
write_csv(episodes, f_ver("episodes"))
write_csv(specimens, f_ver("specimens"))
write_csv(organisms, f_ver("organisms"))
write_csv(antibiotics, f_ver("antibiotics"))

write_csv(persons, f_cur("persons"))
write_csv(episodes, f_cur("episodes"))
write_csv(specimens, f_cur("specimens"))
write_csv(organisms, f_cur("organisms"))
write_csv(antibiotics, f_cur("antibiotics"))

# 5) Optional: Save antibiotic_summary (Sheet-style summary) ----------------
if (exists("antibiotic_summary")) {
 write_csv(antibiotic_summary, f_ver("antibiotic_summary_sheet"))
 write_csv(antibiotic_summary, f_cur("antibiotic_summary_sheet"))
 message("Saved: antibiotic_summary_sheet")
}

# 6) Optional: Save pathogen-enhanced organisms -----------------------------
if (exists("organisms_with_pathogenicity")) {

 write_csv(organisms_with_pathogenicity, f_ver("organisms_pathogen"))
 write_csv(organisms_with_pathogenicity, f_cur("organisms_pathogen"))

 message("Load[organisms_with_pathogenicity]: written as neoseapps_organisms_pathogen_*")
} else {
 message("Load[organisms_with_pathogenicity]: object not found, skipping (OK if pathogen step not run yet).")
}

# 7) Logs --------------------------------------------------------------------
msg_counts <- sprintf(
 "rows - persons: %s | episodes: %s | specimens: %s | organisms: %s",
 nrow(persons), nrow(episodes), nrow(specimens), nrow(organisms)
)

if (exists("organisms_with_pathogenicity")) {
 msg_counts <- paste0(
 msg_counts,
 sprintf(" | organisms_with_pathogenicity: %s",
 nrow(organisms_with_pathogenicity))
 )
}

message("Load complete → ", normalizePath(output_dir, winslash = "/"))
message(" ", msg_counts)
