# Supplementary material
Source: Research Square preprint supplement (doi:10.21203/rs.3.rs-8962388/v1)
Supplement: Supplementary file 6 [file 9abfd0cdedb2ef413b1420e9.docx]

Supplementary File S4 — NeoSEAP Quality Control (QC) Reporting Framework

# Introduction

This supplementary file describes the Quality Control (QC) reporting framework developed for the NeoSEAP analytic workflow.
QC reports are automatically generated for each of the four relational data tables:

- **Persons**
- **Episodes**
- **Specimens**
- **Organisms**

Additionally, QC is performed for:

- **Antibiotic summary tables**
- **Organism pathogenicity classification**

This framework provides a transparent and reproducible approach for assessing completeness, validity, and internal consistency before downstream analyses.

All QC reports are implemented using R Markdown templates and shared QC helper functions stored in:

_Rlib/plot_styles_v1.10a.R

# QC Workflow Overview

Each QC report follows a standardised structure:

1. Identification of key variables
2. Missingness summaries
3. Univariate statistics
4. Time-distribution plots for date variables
5. Logical consistency checks
6. Antibiotic and organism-specific diagnostics
7. Pathogenicity classification QC

# 1. Persons QC Report

## Components included

- Demographic completeness (birthweight, GA, sex)
- Admission and enrolment date QC
- Follow-up outcomes (e.g. D28 status)
- Univariate summaries for all non-date, non-ID variables
- Time-distribution of major dates

## Illustrative code

ms_persons <- missing_summary(persons)

plot_date_count_by_month(persons, "date_enrolment")
plot_date_count_by_week(persons, "date_admission")

date_vars <- c("date_enrolment", "date_admission", "ho_discharge_date", "d28_date")
id_vars <- c("record_id", "participant_id")

other_vars <- setdiff(names(persons), c(date_vars, id_vars))
print_all(univariates(persons, other_vars))

# 2. Episodes QC Report

## Components included

- Episode count per participant
- Completeness of key dates (onset, enrolment, culture date)
- Clinical variables and outcomes
- Logical ordering of episodes
- Time-distribution trends

## Illustrative code

ms_ep <- missing_summary(episodes)

plot_date_count_by_month(episodes, "inf_ep_date")

date_vars <- c("inf_ep_date", "enrol_date", "culture_date_inf_ep")
id_vars <- c("record_id", "participant_id", "episode_id")

other_vars <- setdiff(names(episodes), c(date_vars, id_vars))
print_all(univariates(episodes, other_vars))

# 3. Specimens QC Report

## Components included

- Number of specimens per episode
- Completeness of specimen type & collection date
- Duplicate specimen-ID detection
- Linkage QC with organisms table

## Illustrative code

ms_spec <- missing_summary(specimens)

plot_date_count_by_month(specimens, "culture_date")

date_vars <- "culture_date"
id_vars <- c("record_id", "participant_id", "episode_id", "culture_id")

other_vars <- setdiff(names(specimens), c(date_vars, id_vars))
print_all(univariates(specimens, other_vars))

# 4. Organisms QC Report

## Components included

- Organism name cleaning QC
- Number of organisms per culture / episode
- Distribution of organism categories
- Detection of unexpected or rare organism names
- Review of “Other — please specify”

## Illustrative code

ms_org <- missing_summary(organisms)

table(organisms$organism_name_clean)

id_vars <- c("record_id", "participant_id", "episode_id", "culture_id", "organism_id")

other_vars <- setdiff(names(organisms), id_vars)
print_all(univariates(organisms, other_vars))

# 5. Antibiotic Summary QC

## Components included

- Check for completeness of AWaRe and class categories
- Frequency of antibiotic groups
- Detection of uncommon or unexpected drug names

## Illustrative code

ms_abx <- missing_summary(antibiotic_summary)

antibiotic_summary %>% count(abx_grp_1_all, sort = TRUE)
antibiotic_summary %>% count(abx_grp_2_all, sort = TRUE)

# 6. Pathogenicity Assignment QC

Pathogenicity is added during the Transform step and saved in:

organisms_with_pathogenicity

Categories include:

- **pathogen**
- **contaminant**
- **conditional**
- **unknown**

## Illustrative QC steps

### Distribution

table(organisms_with_pathogenicity$pathogenicity)

### Cross-tabulation

table(organisms_with_pathogenicity$organism_name_clean,
 organisms_with_pathogenicity$pathogenicity)

### Validation of “Other” cleaning

subset(organisms_with_pathogenicity,
 grepl("Other", organism_name_clean, ignore.case = TRUE))

### Temporal contamination QC

plot_date_count_by_month(organisms_with_pathogenicity, "culture_date")

# 7. Example End-to-End QC (Illustrative)

org_patho <- readr::read_csv("data/output/neoseapps_organisms_pathogen_latest.csv")

missing_summary(org_patho)
table(org_patho$pathogenicity)
plot_date_count_by_month(org_patho, "culture_date")

# 8. Location of QC Scripts

All QC templates and helper code used to generate the reports are available in the GitHub folder:

/neoseap/scripts/

Including:

- general_persons_report.Rmd
- general_episodes_report.Rmd
- general_specimens_report.Rmd
- general_organisms_report.Rmd
- general_organisms_pathogen_report.Rmd
- general_antibiotics_report.Rmd

# Conclusion

The NeoSEAP QC framework provides a robust system for validating data completeness, consistency, and biological plausibility across all levels of the dataset, ensuring high-quality inputs for epidemiological analysis.
